# Supplementary material for: Biophysical investigation of interactions between sorbic acid and human serum albumin through spectroscopic and computational approaches
Source: Royal Society of Chemistry journal article supplement (doi:10.1039/d0nj06276f), 2021-01-01
Supplement: d0nj06276f1.pdf [file d0nj06276f1.pdf]

## Supplementary data

### Biophysical investigation of interactions between sorbic acid and human serum albumin through spectroscopic and computational approaches

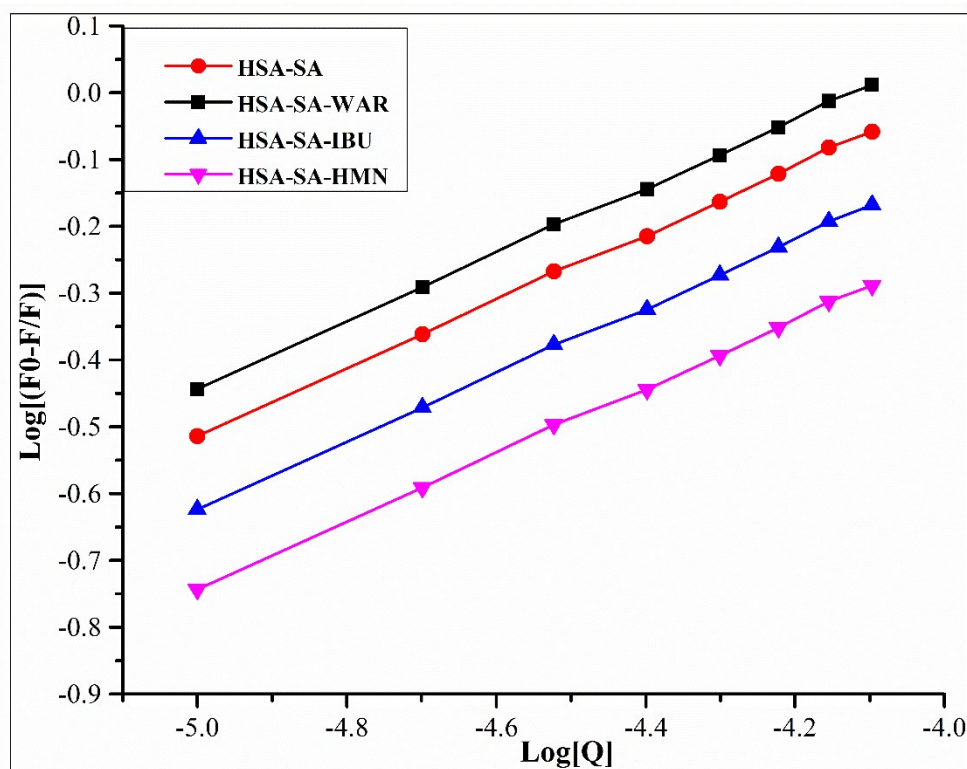

Figure S1: The drug displacement experiment plots at 298K. Three different markers used for the exact location of the SA binding on the HSA, these markers are represented by the codes, IBU, WAR and HMN for the Ibuprofen, Warfarin and Hemin respectively.
